# Supplementary material
Source: MDPI journal article supplement (https://www.mdpi.com/2073-4395/11/8/1524)
Supplement: s1 [file s1]

## Supplementary Materials:

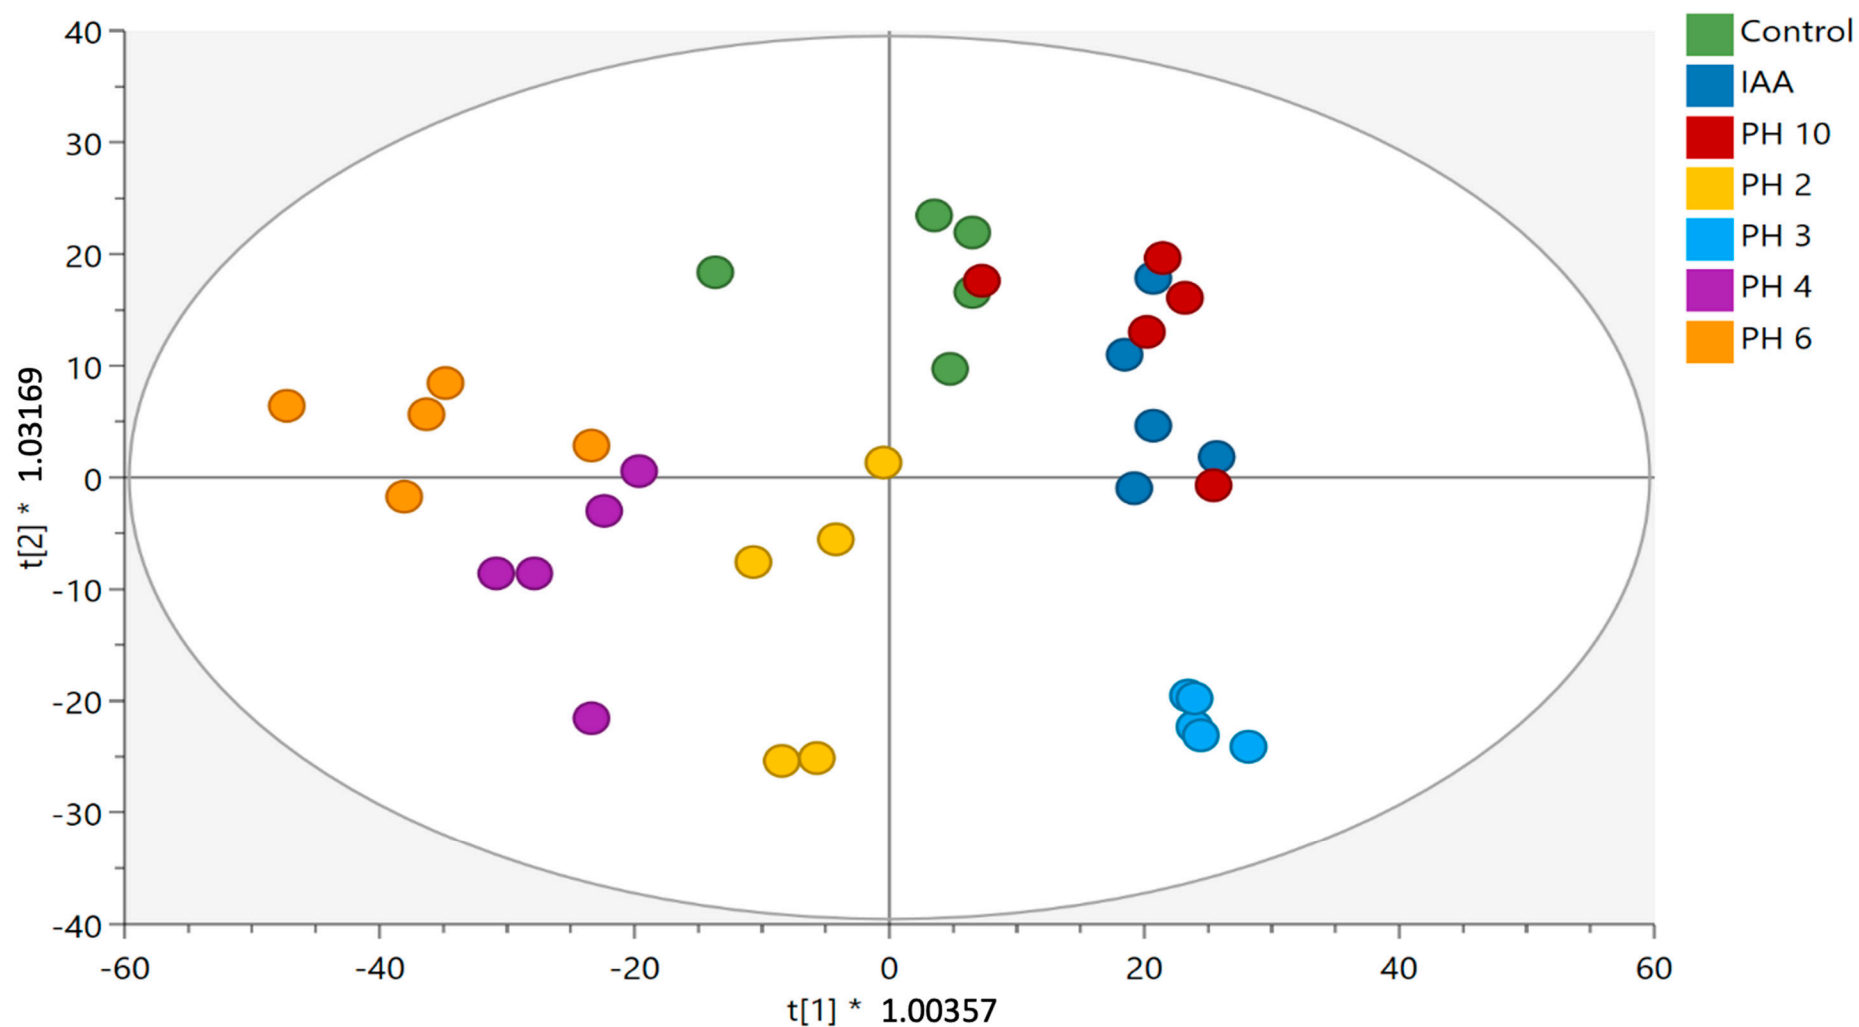

**Figure S1.** Score plot of orthogonal projection to latent structures discriminant analysis (OPLS-DA) supervised modeling carried out on untargeted metabolomics profiles of tomato roots following PHs application ( $R^2Y = 0.888$ ,  $Q^2Y = 0.512$ )

**Table S1.** Sequence of gene-specific oligonucleotides used for Real Time RT-PCR analyses.

| Gene                            | Primer Forward (5'-3') | Primer Reverse (5'-3')    |
|---------------------------------|------------------------|---------------------------|
| <i>LeIAA2</i>                   | ATGAAAGGATCTGAAGCTAAAG | CAAATAAATAGAGTTAGATATACAT |
| <i>LeIAA9</i>                   | CCTATCTACACATGATTAAAGC | AGGATTCAAGTTTATGAGCTCT    |
| <i>LeEF1<math>\alpha</math></i> | ACTGTGCAGTGTGATGCTGG   | AATACACAACCTCAAAGACCAAAC  |

**Table S2.** Complete list of compounds obtained through metabolomic analysis.

Table S2 is a too big xls file containing raw data to be copied and paste into a word file. Please see the independent files

**Table S3.** List of differentially represented metabolites according to Volcano Plot analysis.

Table S3 is a too big xls file containing raw data to be copied and paste into a word file. Please see the independent files
